# Supplementary material for: Synthesis of the C8’-epimeric thymine pyranosyl amino acid core of amipurimycin
Source: publisher site journal article supplement (doi:10.3762/bjoc.12.165), 2016-08-05
Supplement: Additional file 2 [file 1860-5397-12-165-S2.pdf]

**Supporting Information**  
**for**  
**Synthesis of the C8'-epimeric thymine pyranosyl amino**  
**acid core of amipurimycin**

Pramod R. Markad, Navanath Kumbhar and Dilip D. Dhavale\*

Address: Garware Research Centre, Department of Chemistry, Savitribai Phule Pune  
University (Formerly University of Pune), Pune-411007, India.

Email: Dilip D. Dhavale - ddd@chem.unipune.ac.in

\*Corresponding author

**Copies of NMR spectra**

Table of Contents

|                                                                                      |               |
|--------------------------------------------------------------------------------------|---------------|
| <sup>1</sup> H and <sup>13</sup> C spectra of new compounds <b>4–21</b> and <b>2</b> | <b>s2–s18</b> |
| NOESY spectrum of compound <b>14</b>                                                 | <b>s19</b>    |

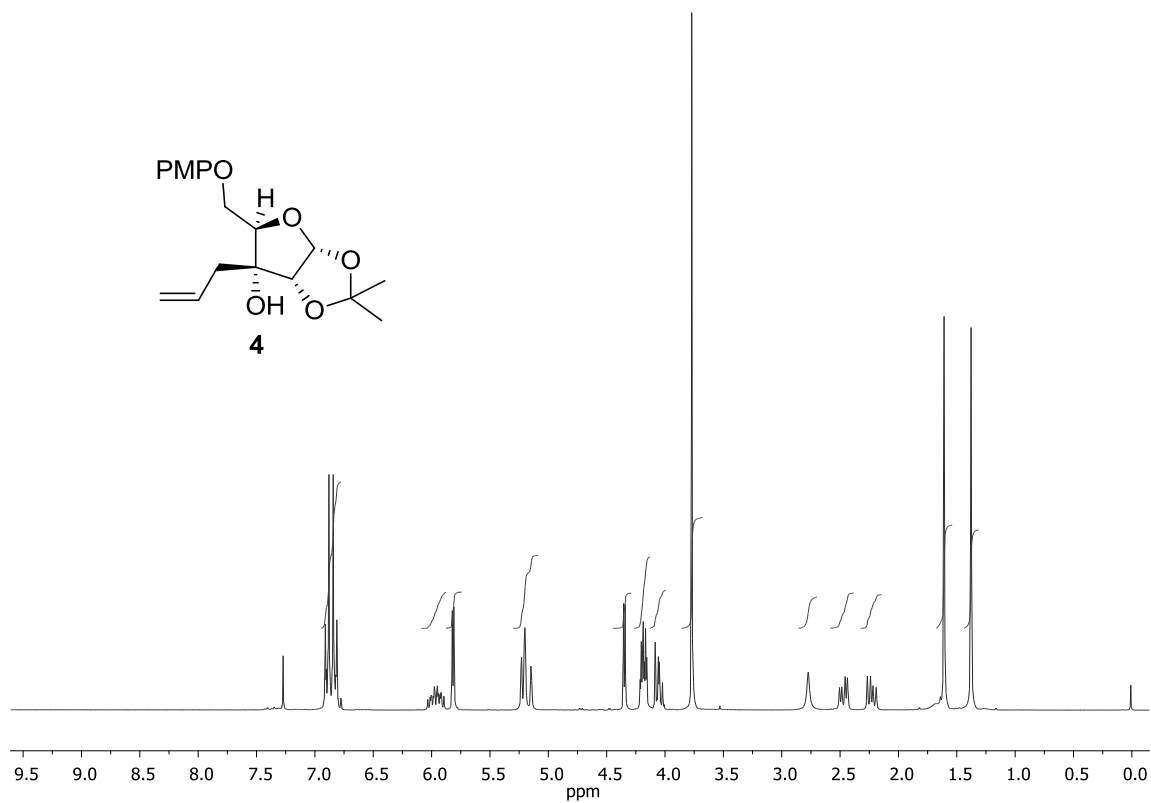

**Figure 1:**  $^1\text{H}$  NMR (300 MHz,  $\text{CDCl}_3$ ) spectrum of compound **4**.

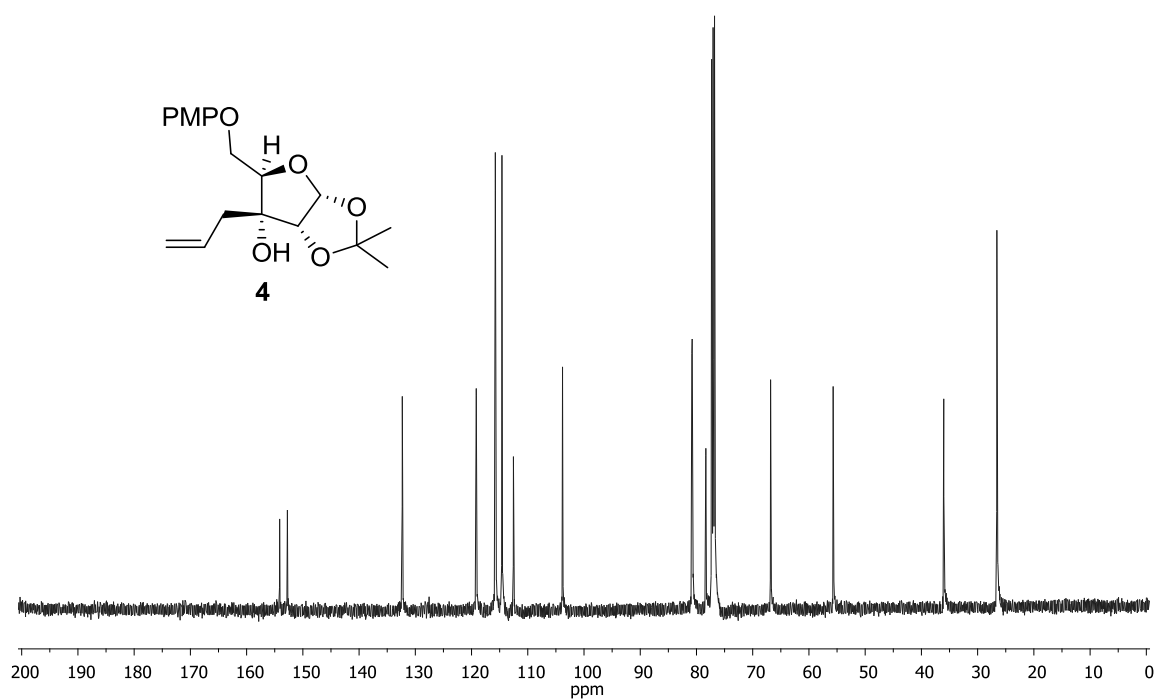

**Figure 2:**  $^{13}\text{C}$  NMR (125 MHz,  $\text{CDCl}_3$ ) spectrum of compound **4**.

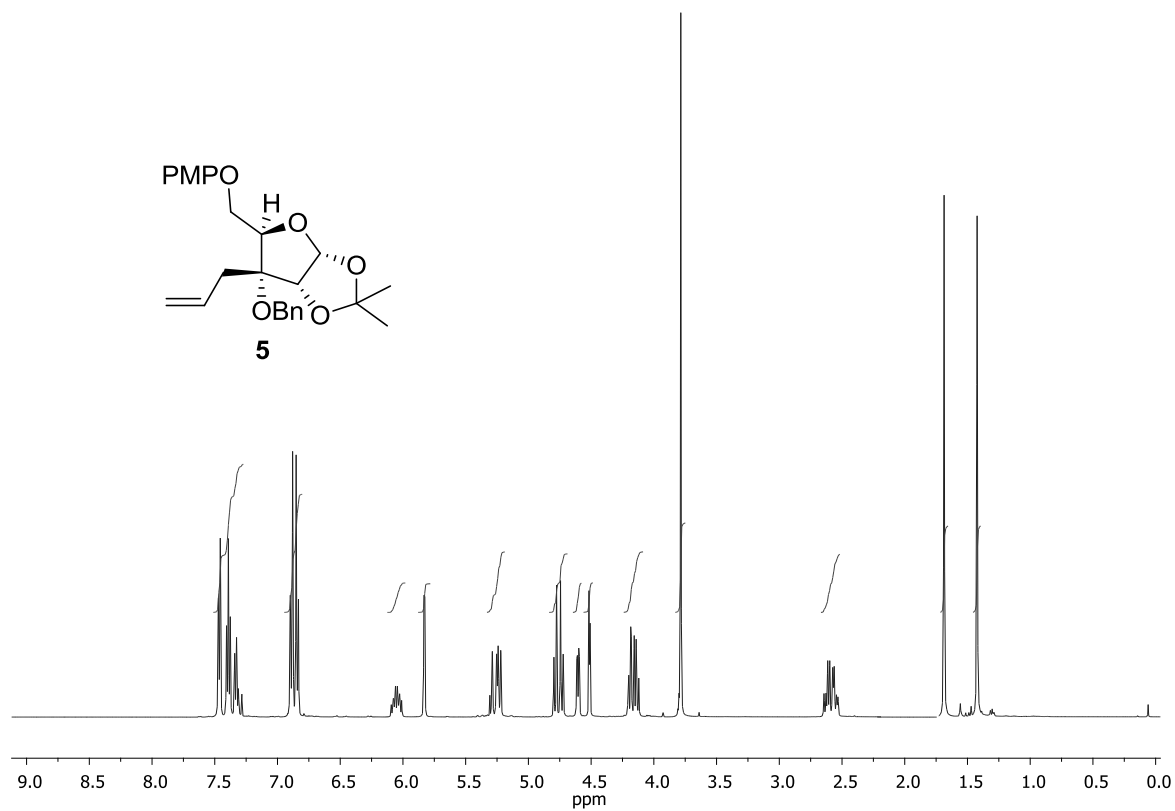

**Figure 3:**  $^1\text{H}$  NMR (500 MHz,  $\text{CDCl}_3$ ) spectrum of compound **5**.

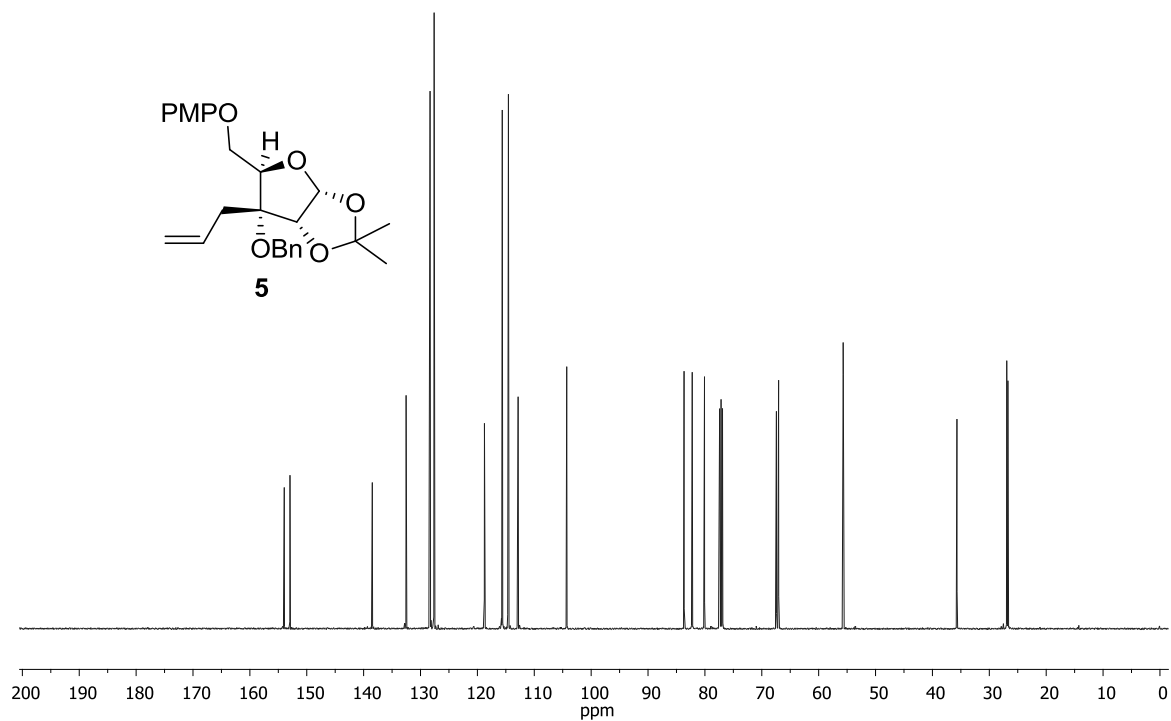

**Figure 4:**  $^{13}\text{C}$  NMR (125 MHz,  $\text{CDCl}_3$ ) spectrum of compound **5**.

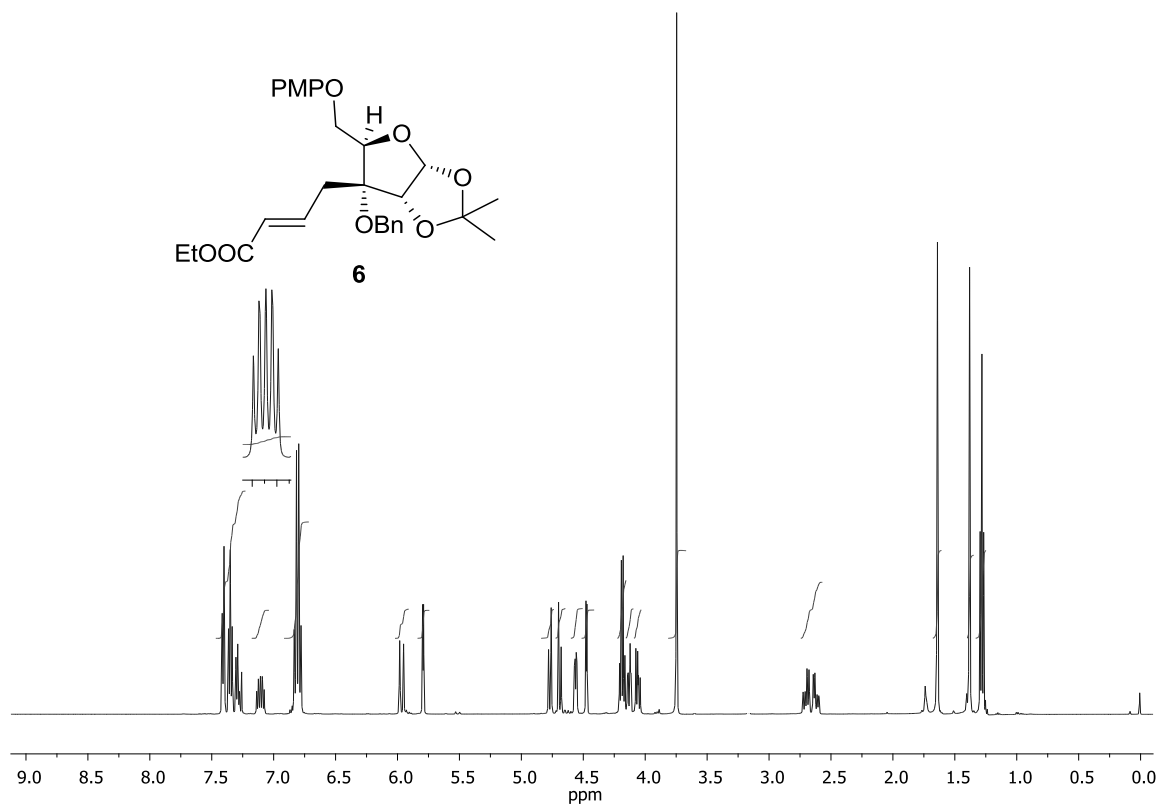

**Figure 5:**  $^1\text{H}$  NMR (500 MHz,  $\text{CDCl}_3$ ) spectrum of compound **6**

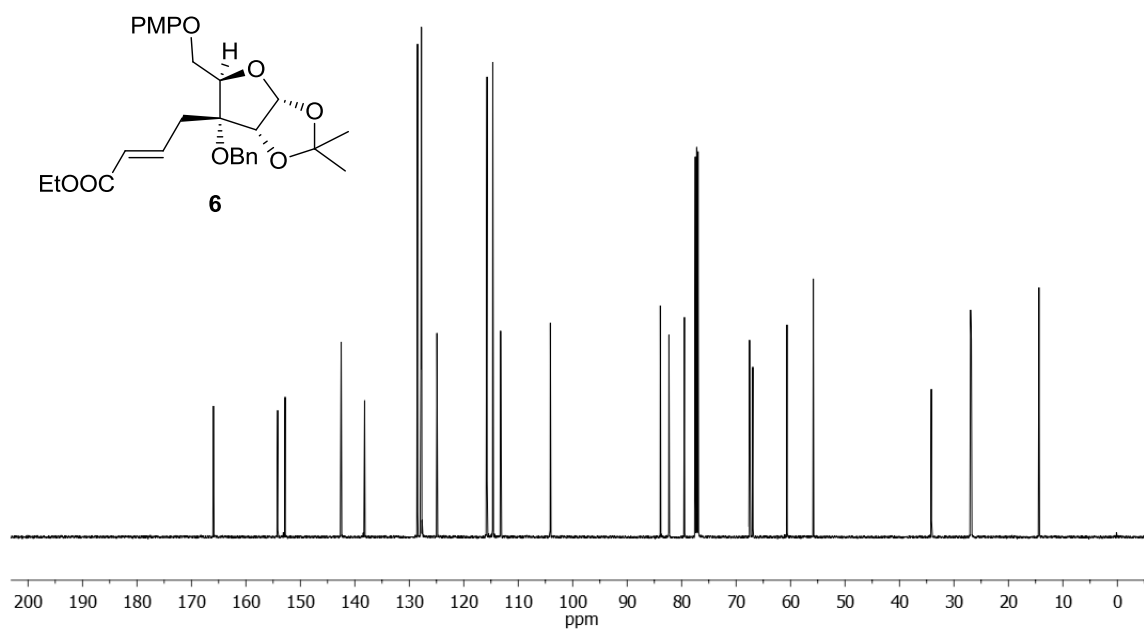

**Figure 6:**  $^{13}\text{C}$  NMR (125 MHz,  $\text{CDCl}_3$ ) spectrum of compound **6**

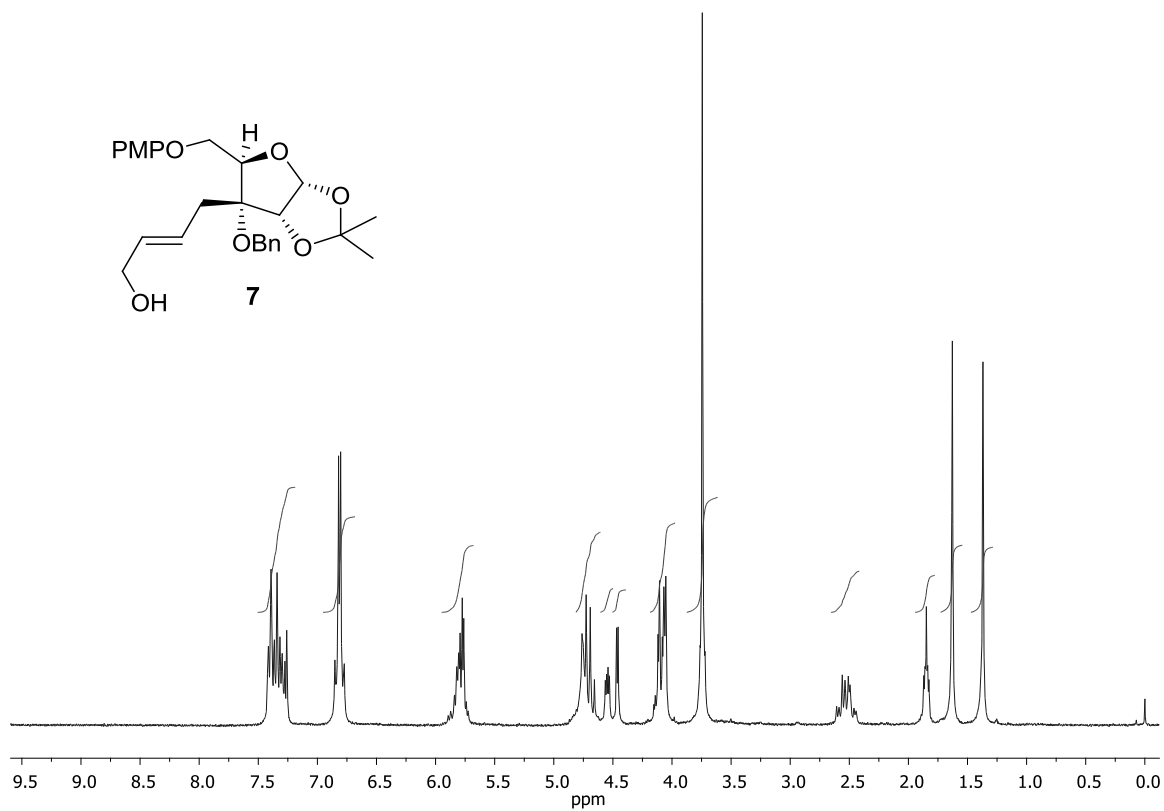

**Figure 7:**  $^1\text{H}$  NMR (300 MHz,  $\text{CDCl}_3$ ) spectrum of compound **7**

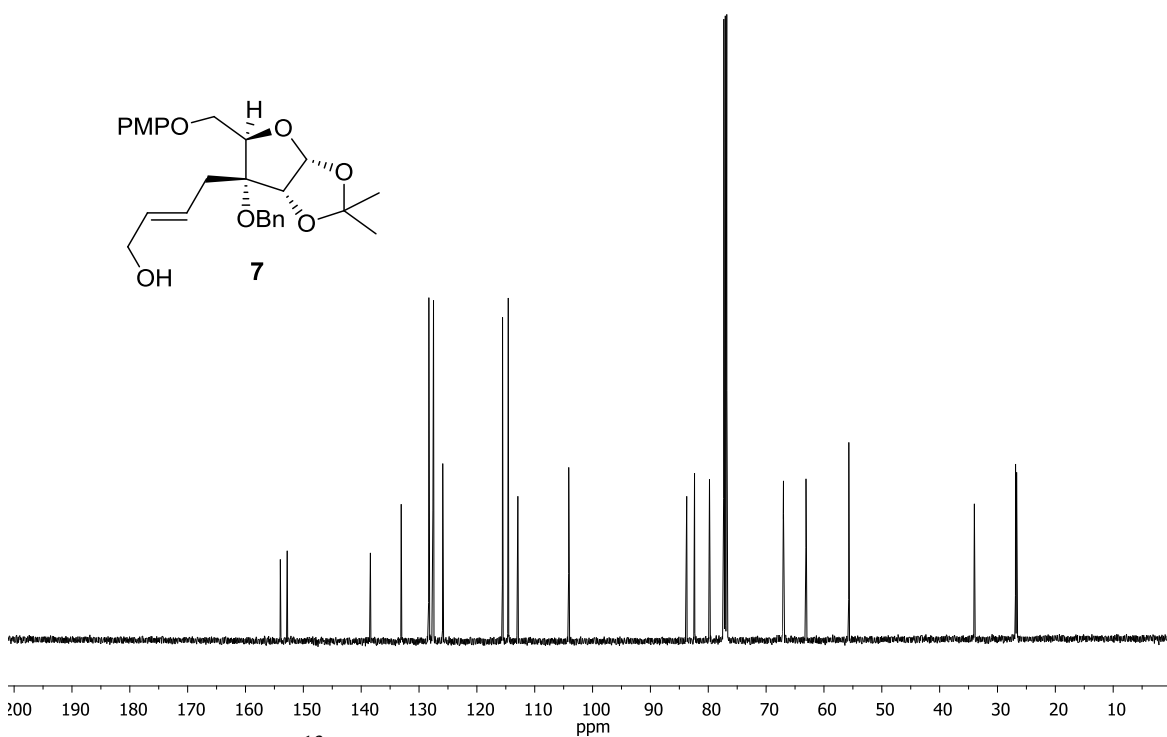

**Figure 8:**  $^{13}\text{C}$  NMR (125 MHz,  $\text{CDCl}_3$ ) spectrum of compound **7**

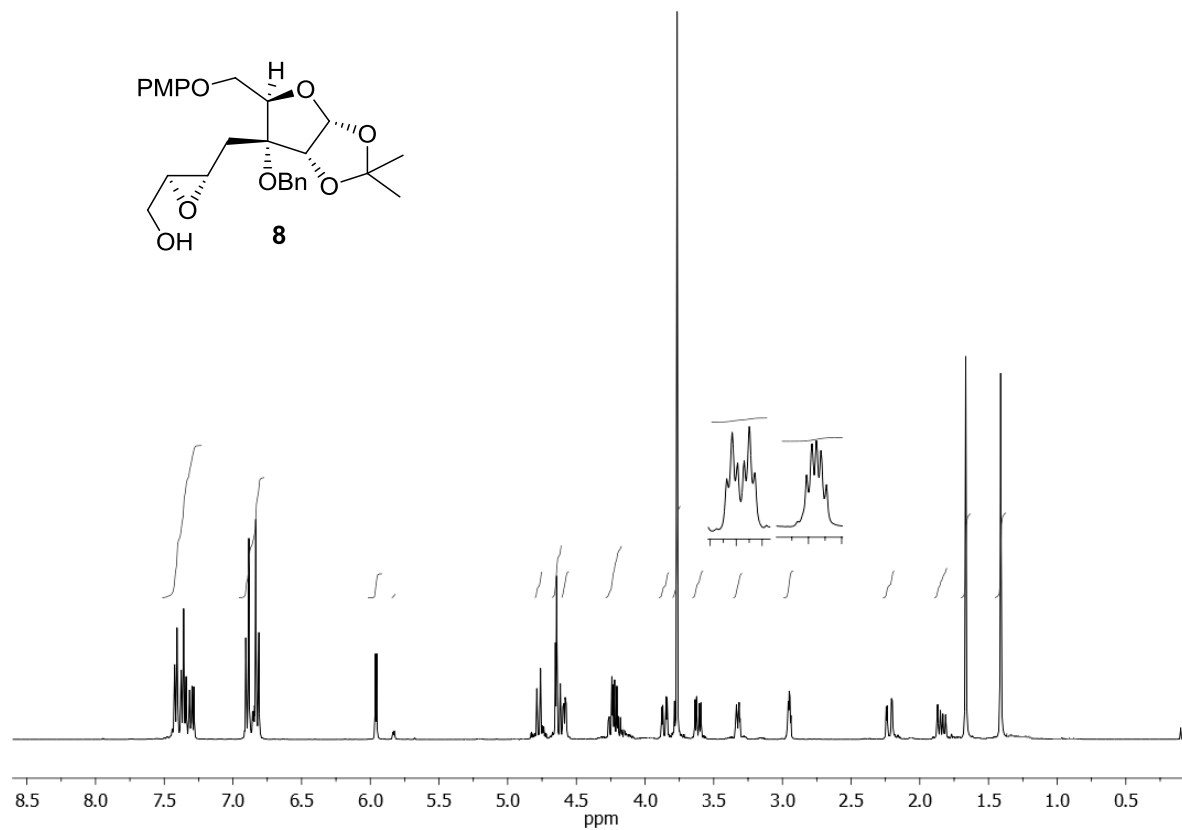

**Figure 9:**  $^1\text{H}$  NMR (400 MHz,  $\text{CDCl}_3$ ) spectrum of compound **8**

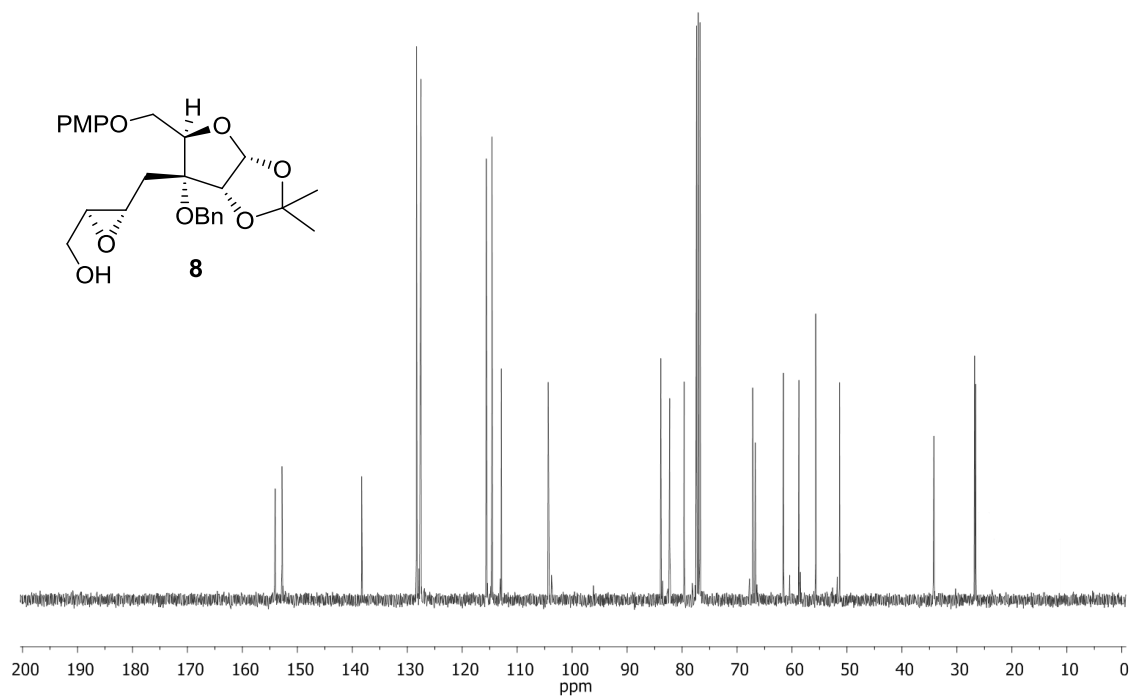

**Figure 10:**  $^{13}\text{C}$  NMR (100 MHz,  $\text{CDCl}_3$ ) spectrum of compound **8**

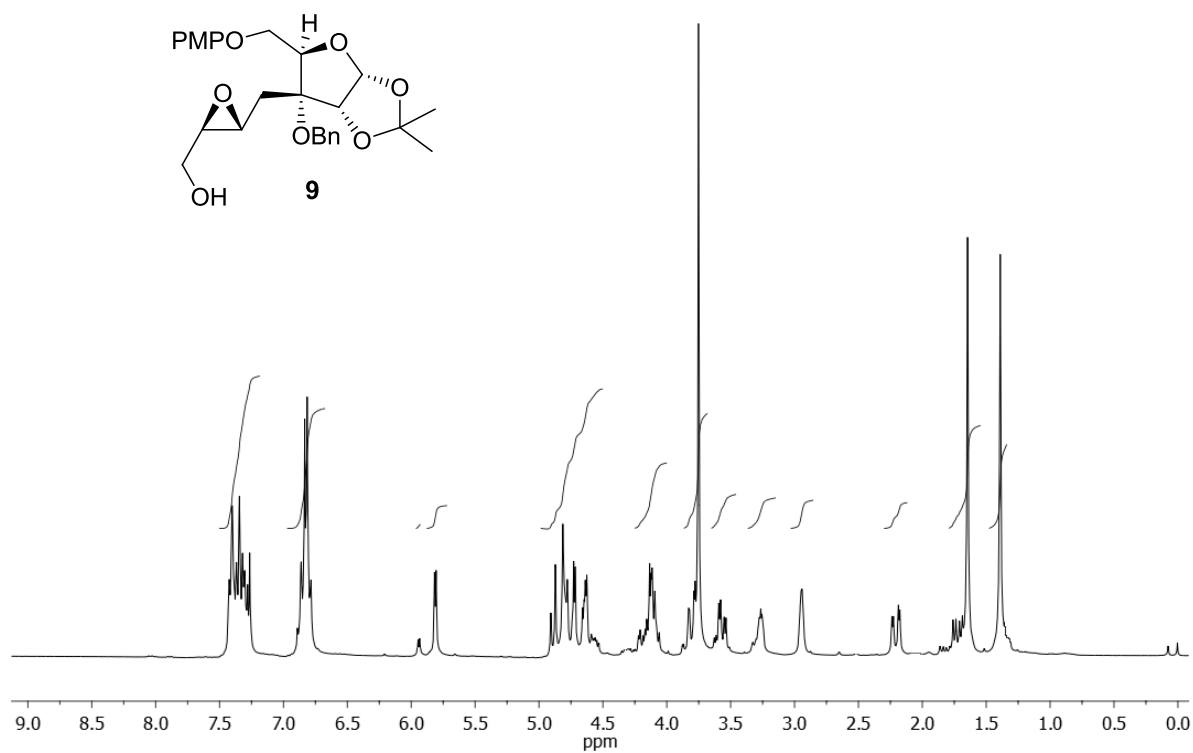

**Figure 11:** <sup>1</sup>H NMR (300 MHz, CDCl<sub>3</sub>) spectrum of compound **9**

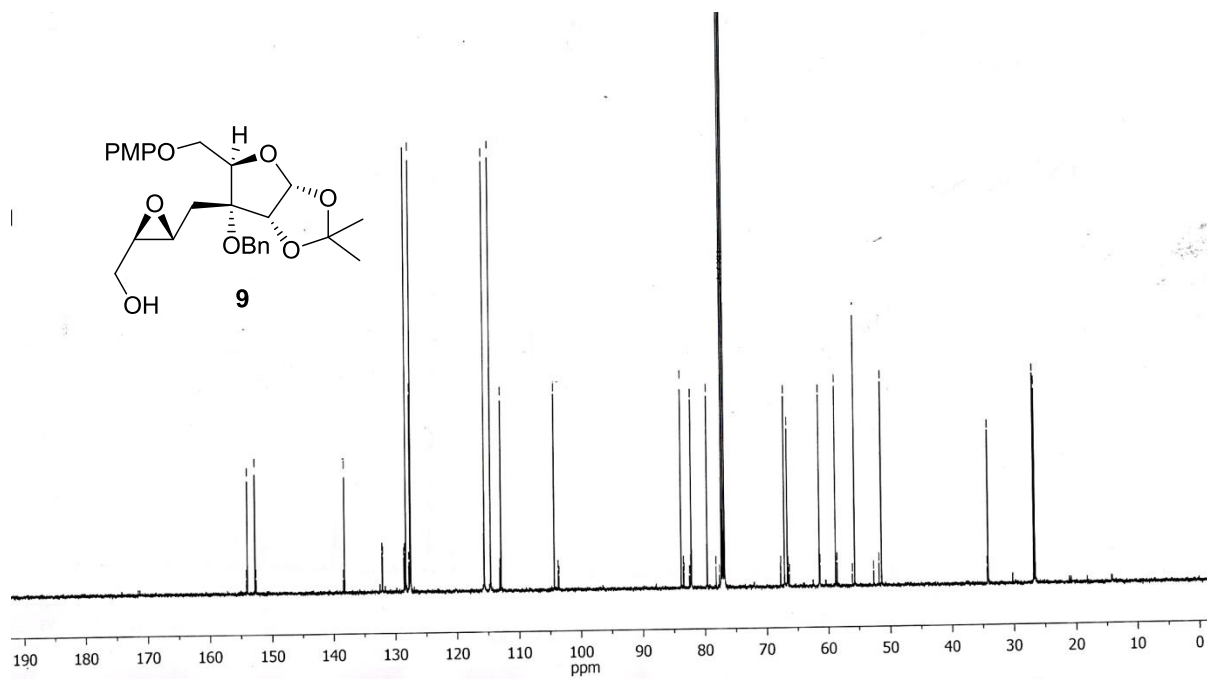

**Figure 12:** <sup>13</sup>C NMR (125 MHz, CDCl<sub>3</sub>) spectrum of compound **9**

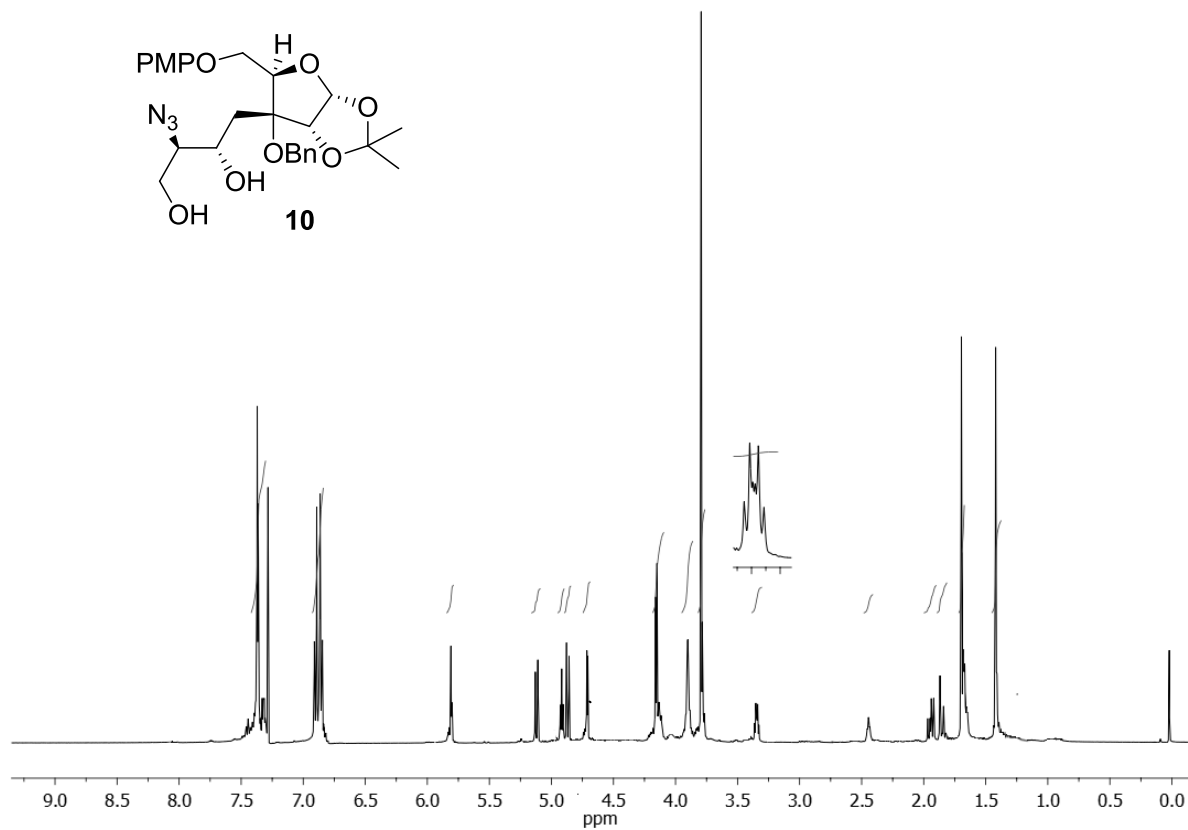

**Figure 13:** <sup>1</sup>H NMR (500 MHz, CDCl<sub>3</sub>) spectrum of compound **10**

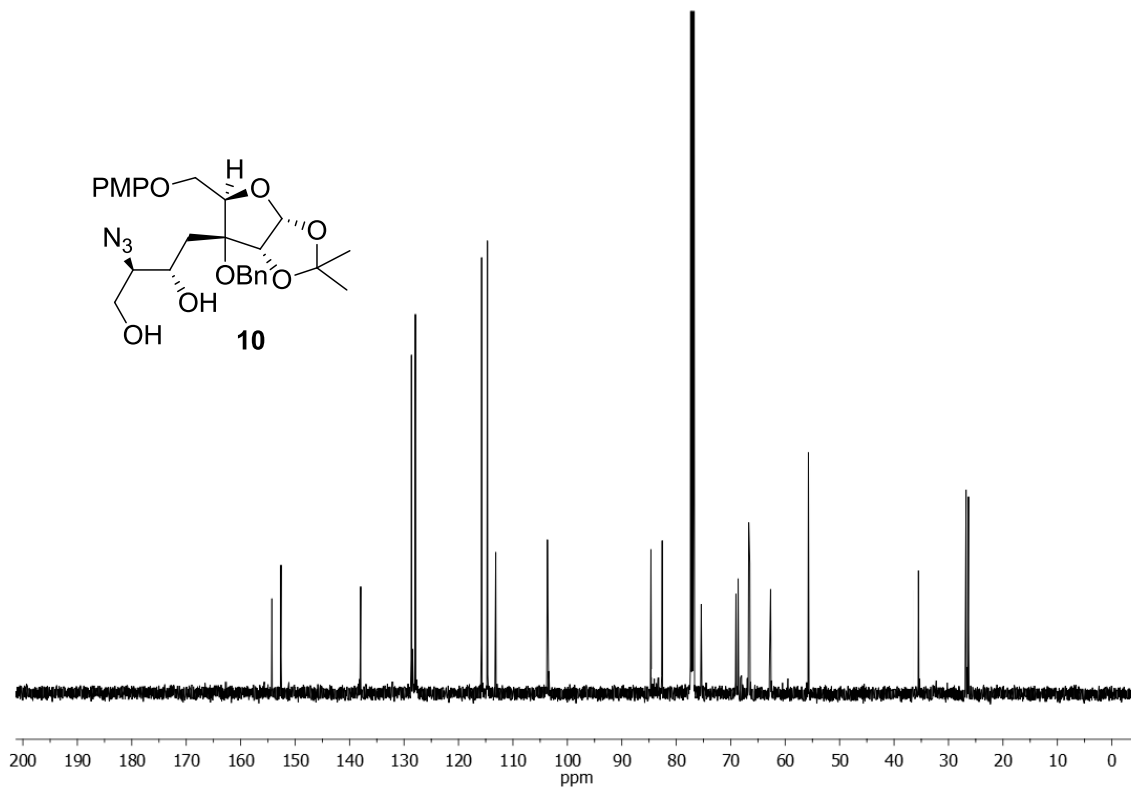

**Figure 14:** <sup>13</sup>C NMR (125 MHz, CDCl<sub>3</sub>) spectrum of compound **10**



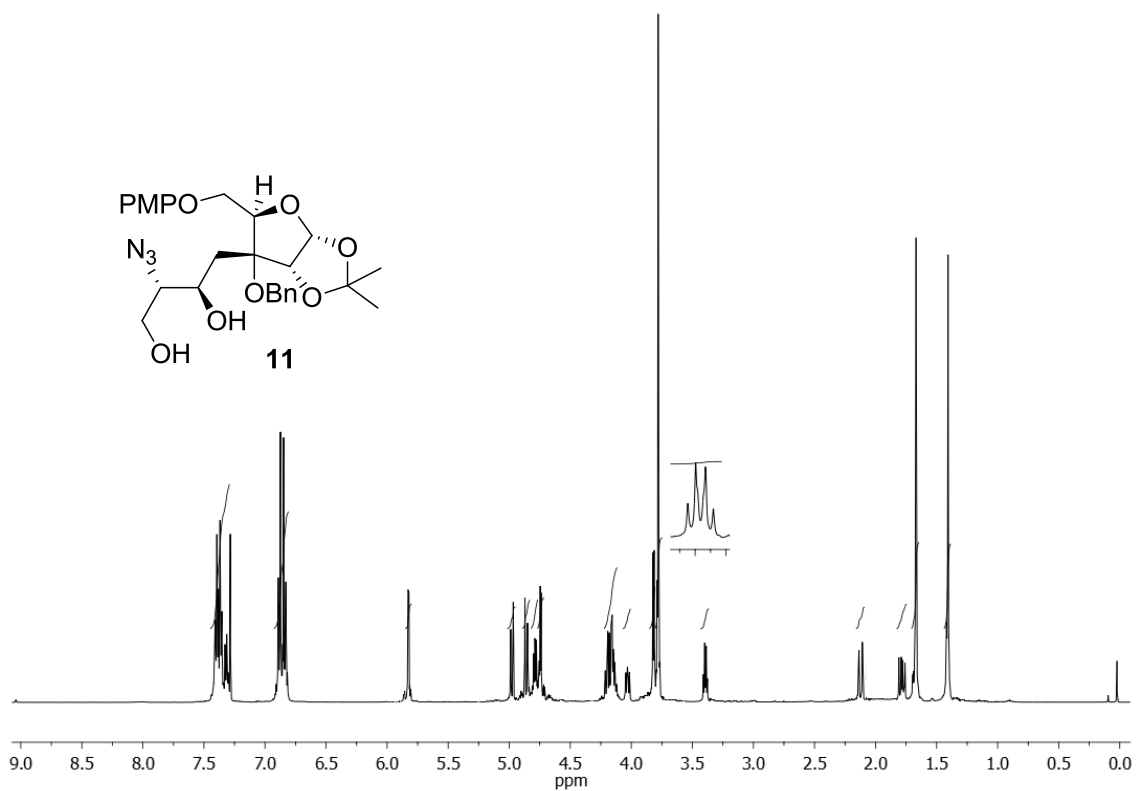

**Figure 15:**  $^1\text{H}$  NMR (500 MHz,  $\text{CDCl}_3$ ) spectrum of compound **11**

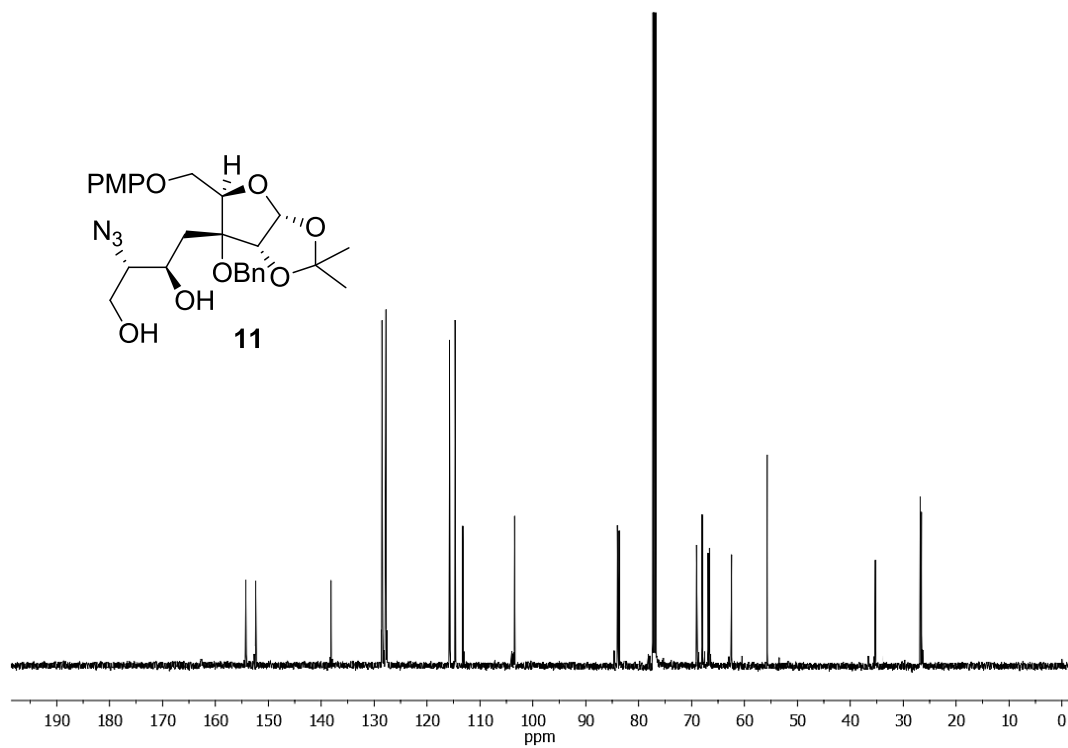

**Figure 16:**  $^{13}\text{C}$  NMR (125 MHz,  $\text{CDCl}_3$ ) spectrum of compound **11**

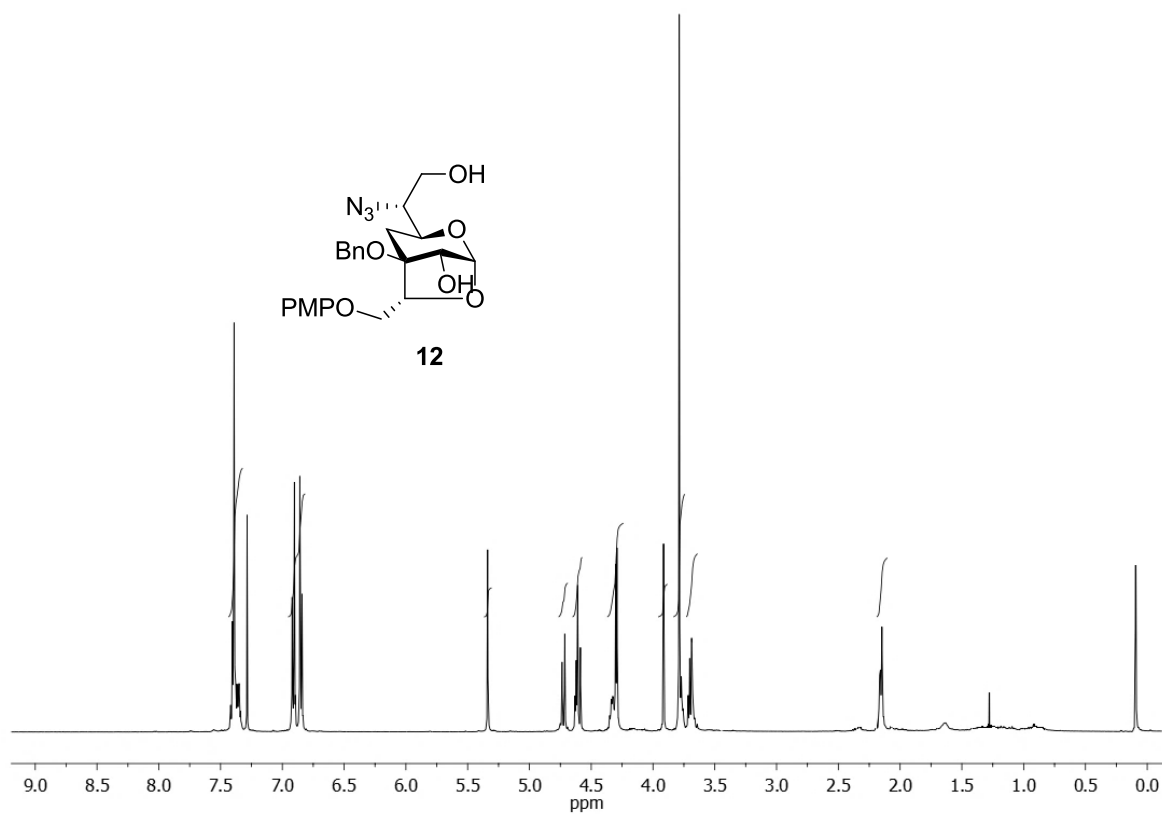

**Figure 17:**  $^1\text{H}$  NMR (500 MHz,  $\text{CDCl}_3$ ) spectrum of compound **12**

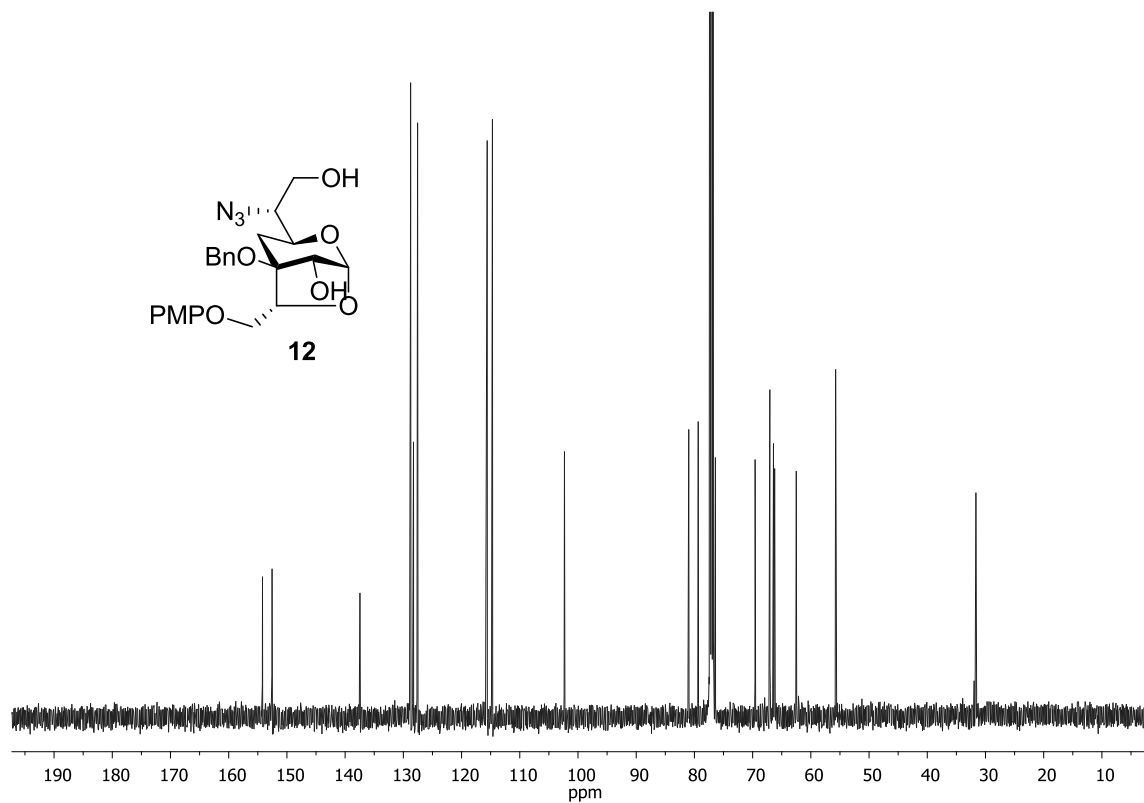

**Figure 18:**  $^{13}\text{C}$  NMR (125 MHz,  $\text{CDCl}_3$ ) spectrum of compound **12**

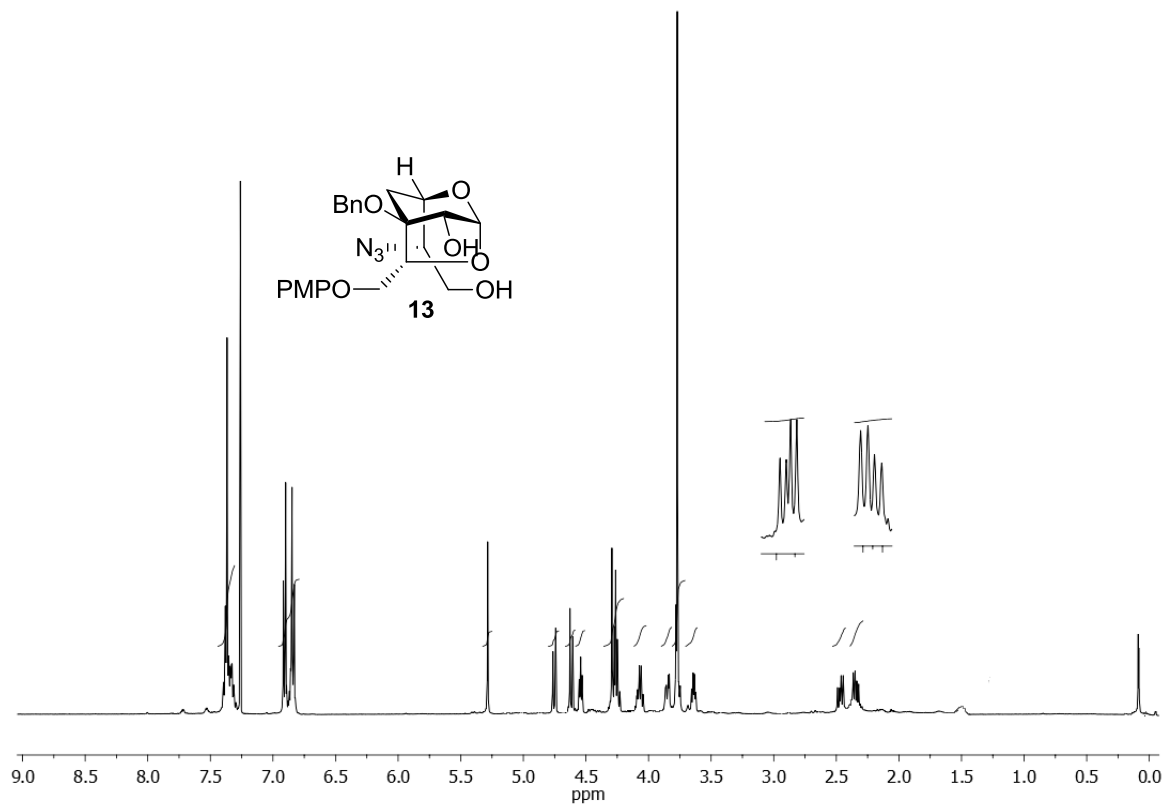

**Figure 19:** <sup>1</sup>H NMR (500 MHz, CDCl<sub>3</sub>) spectrum of compound **13**

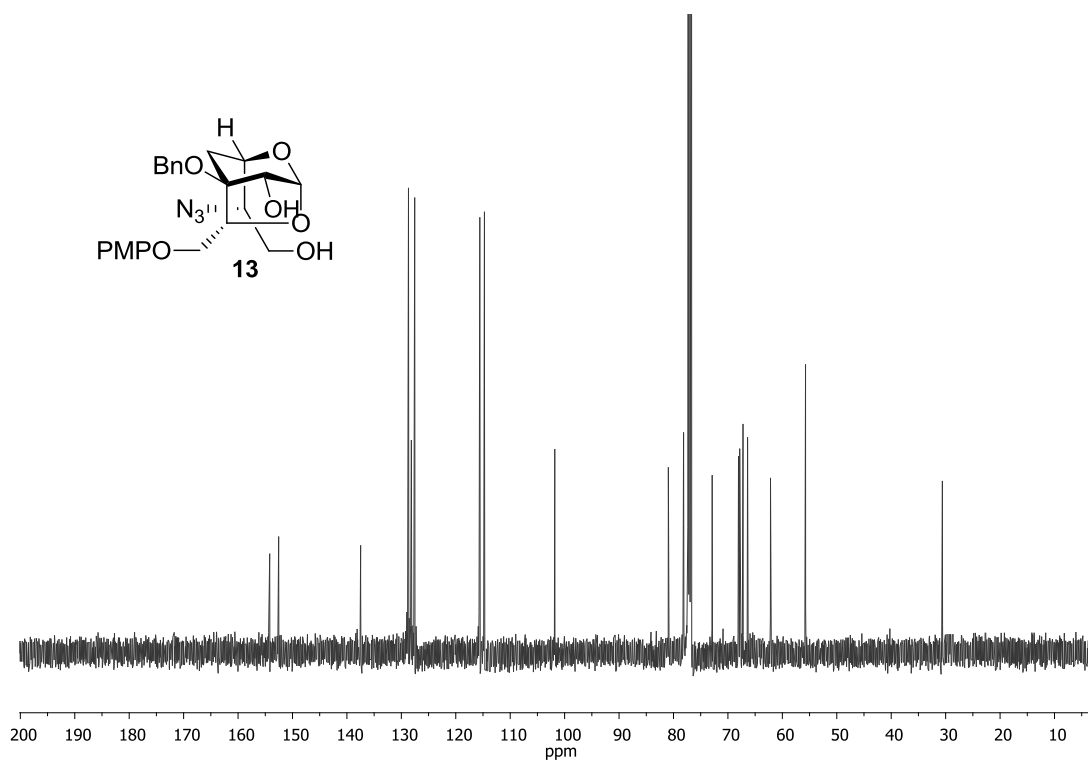

**Figure 20:** <sup>13</sup>C NMR (125 MHz, CDCl<sub>3</sub>) spectrum of compound **13**

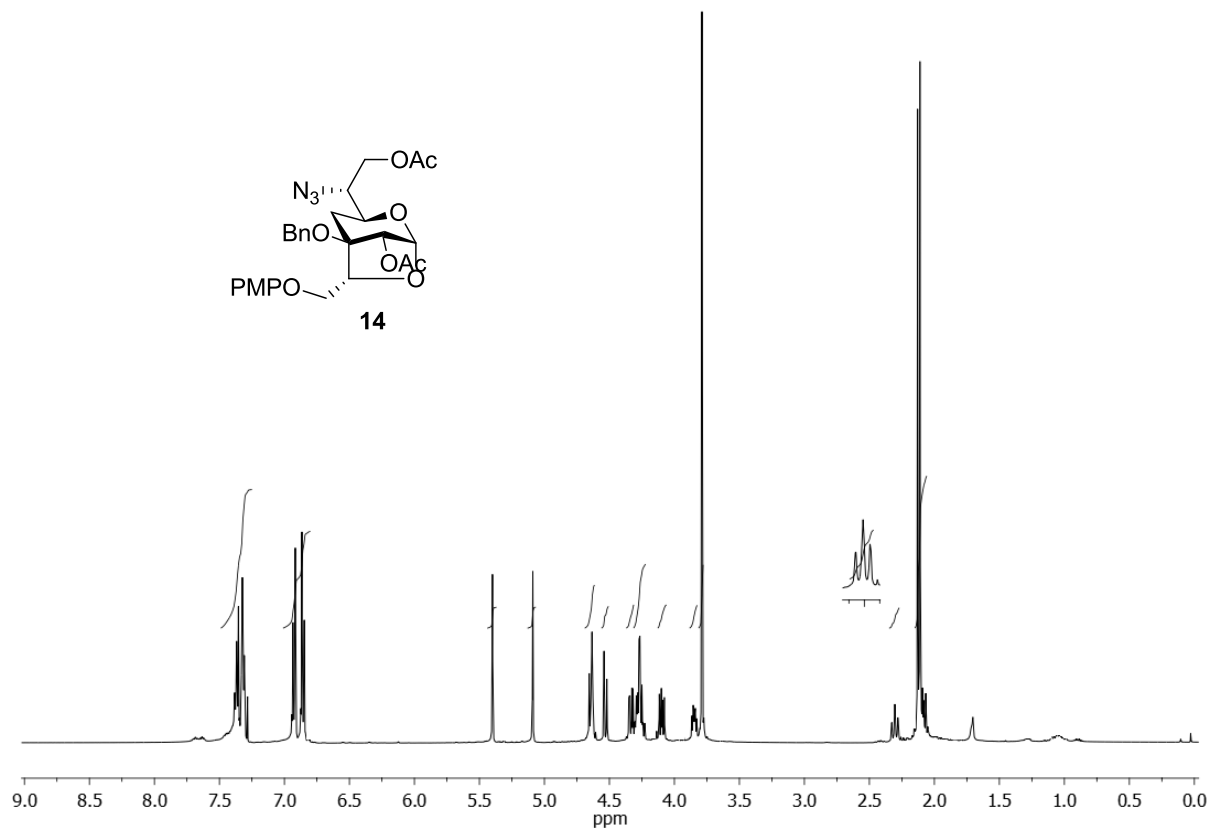

**Figure 21:** <sup>1</sup>H NMR (500 MHz, CDCl<sub>3</sub>) spectrum of compound **14**

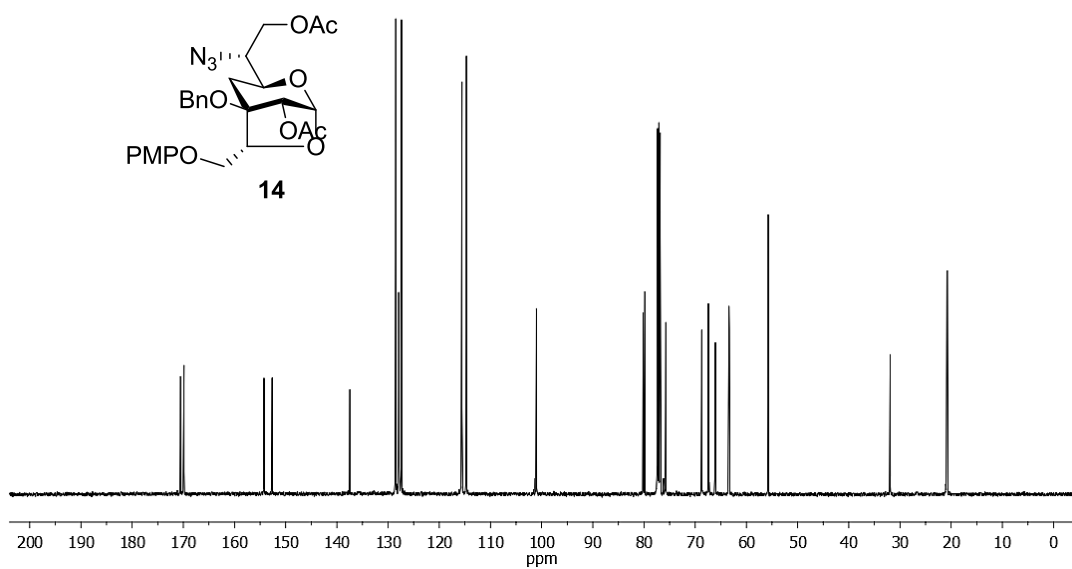

**Figure 22:** <sup>13</sup>C NMR (125 MHz, CDCl<sub>3</sub>) spectrum of compound **14**

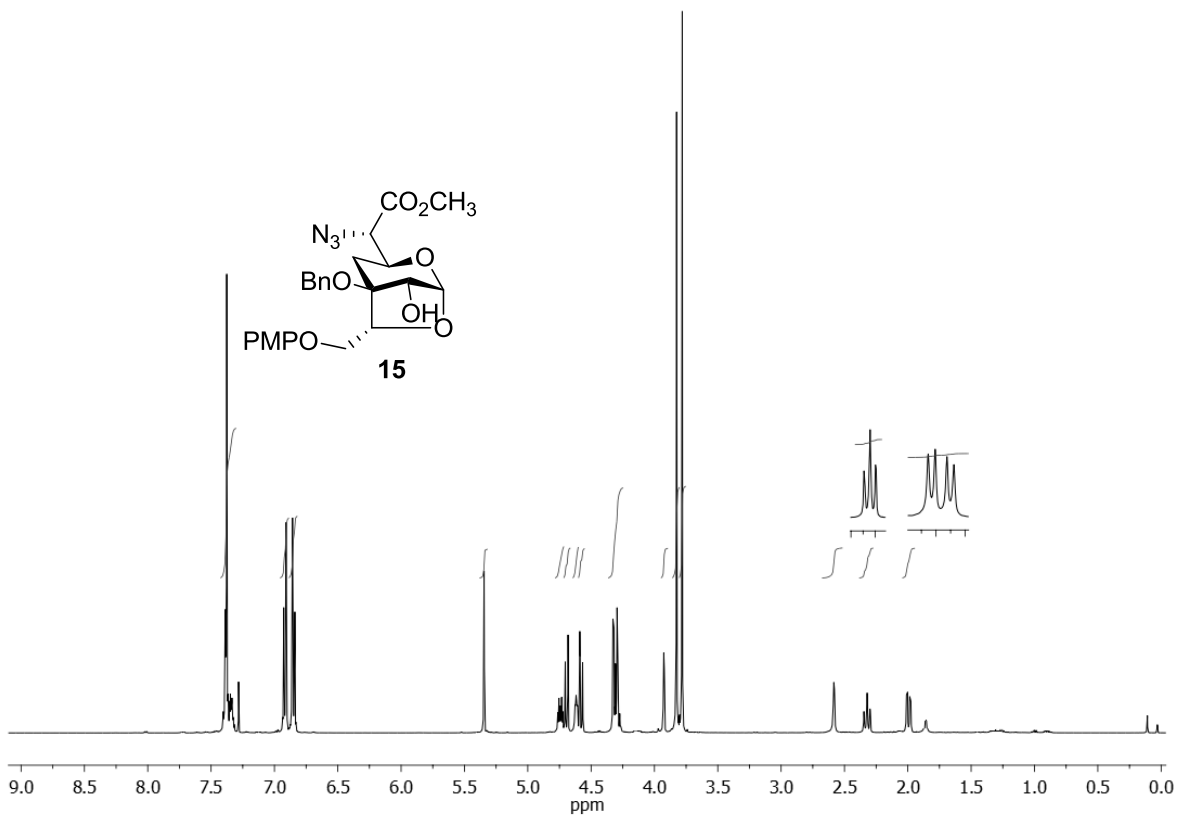

**Figure 23:**  $^1\text{H}$  NMR (500 MHz,  $\text{CDCl}_3$ ) spectrum of compound **15**

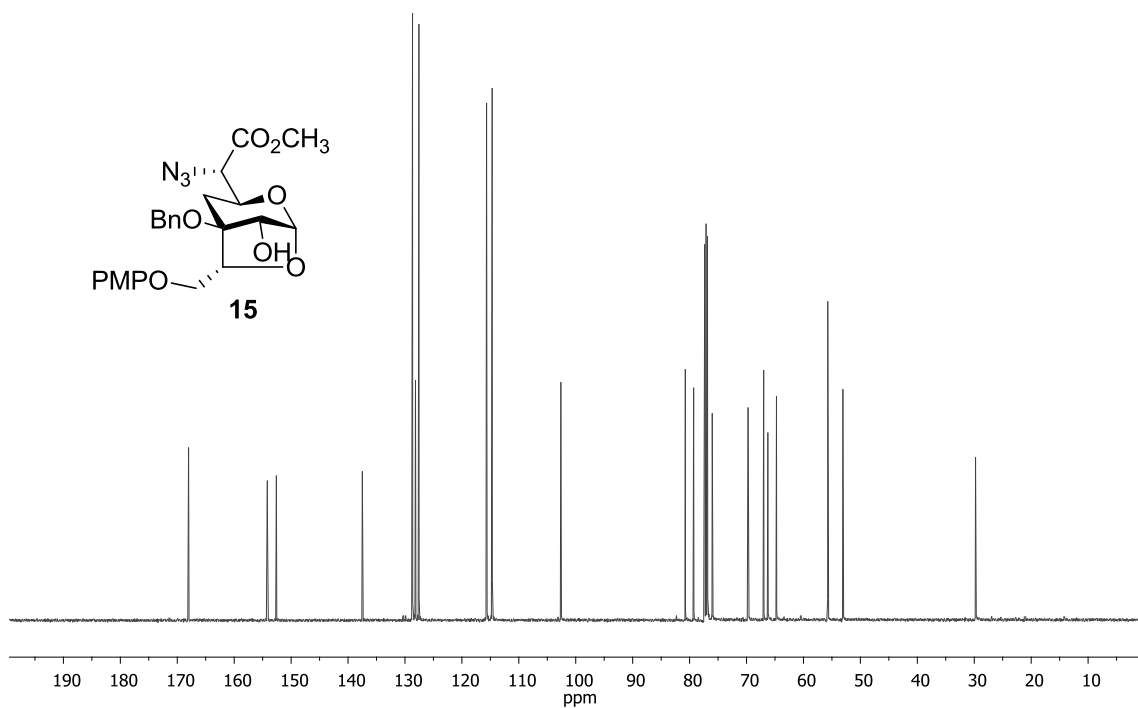

**Figure 24:**  $^{13}\text{C}$  NMR (125 MHz,  $\text{CDCl}_3$ ) spectrum of compound **15**

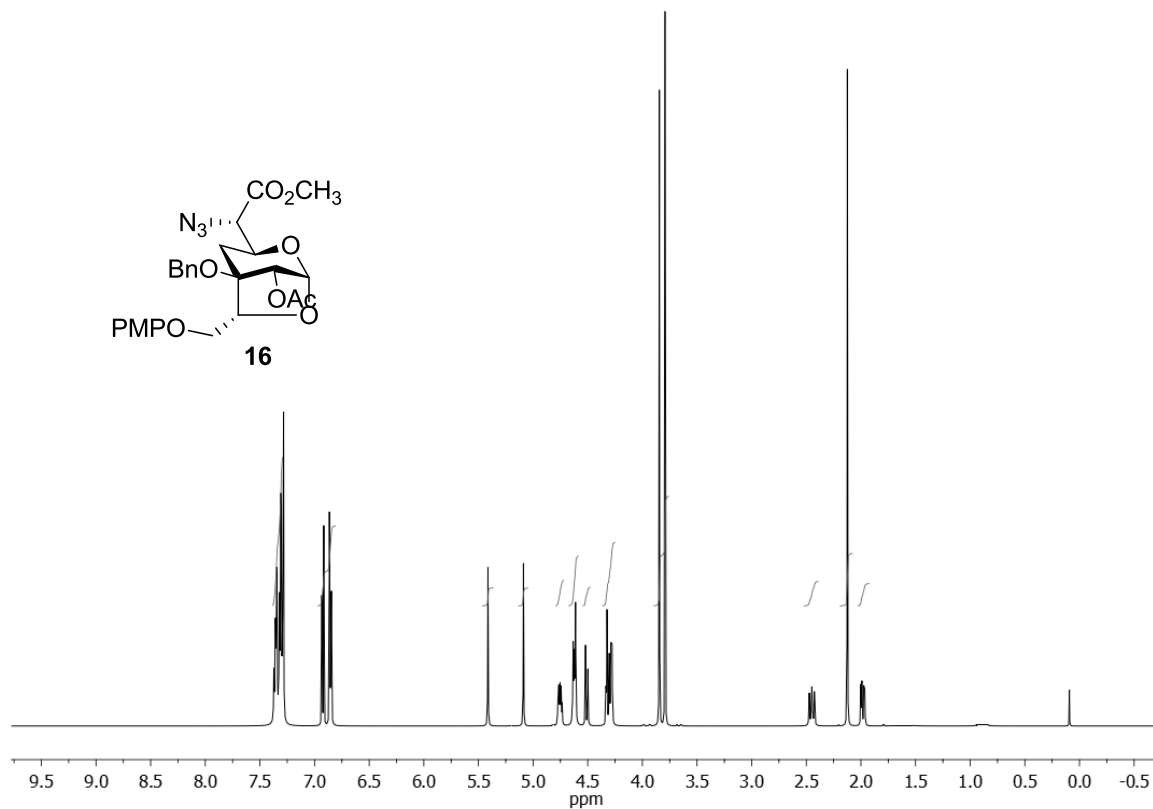

**Figure 25:**  $^1\text{H}$  NMR (500 MHz,  $\text{CDCl}_3$ ) spectrum of compound **16**

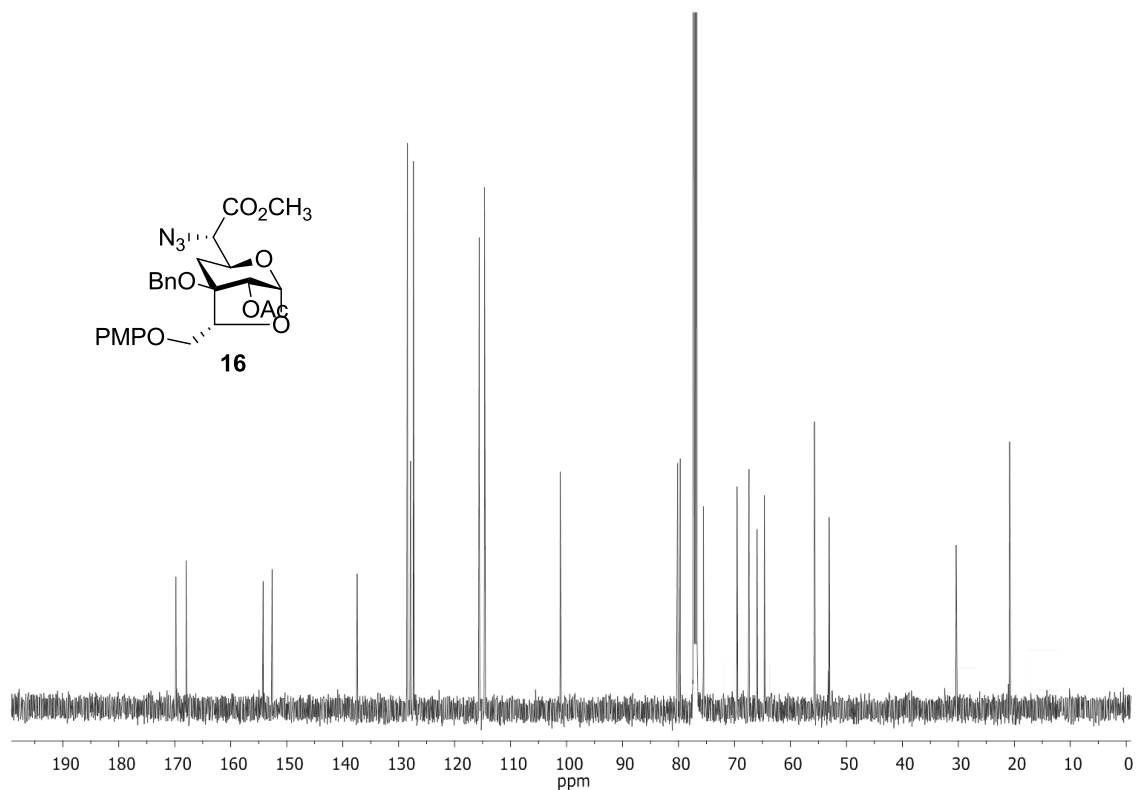

**Figure 26:**  $^{13}\text{C}$  NMR (125 MHz,  $\text{CDCl}_3$ ) spectrum of compound **16**

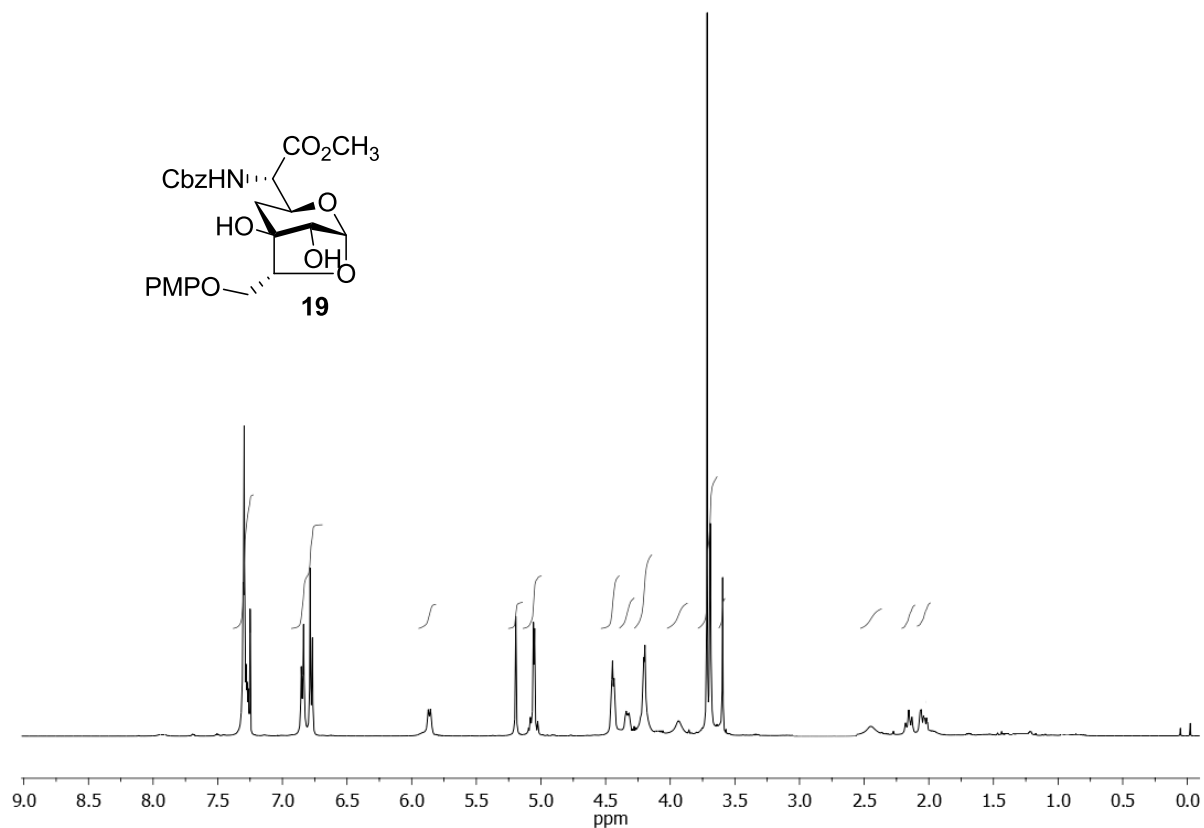

**Figure 27:** <sup>1</sup>H NMR (500 MHz, CDCl<sub>3</sub>) spectrum of compound **19**

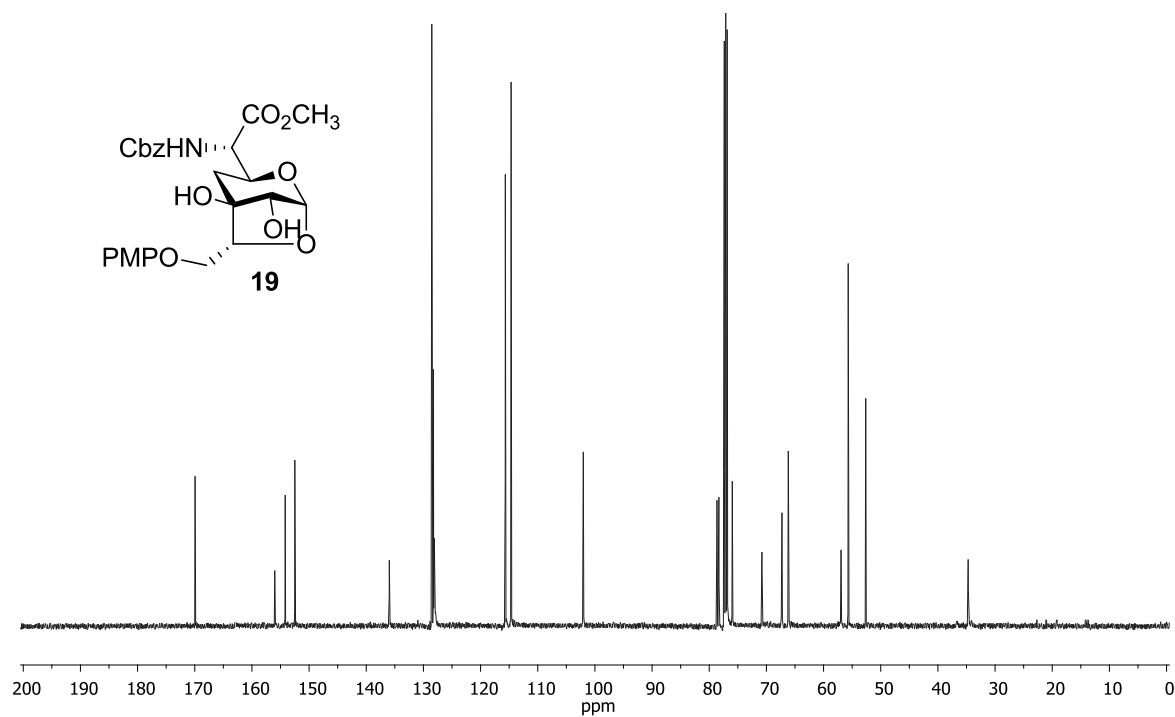

**Figure 28:** <sup>13</sup>C NMR (125 MHz, CDCl<sub>3</sub>) spectrum of compound **19**

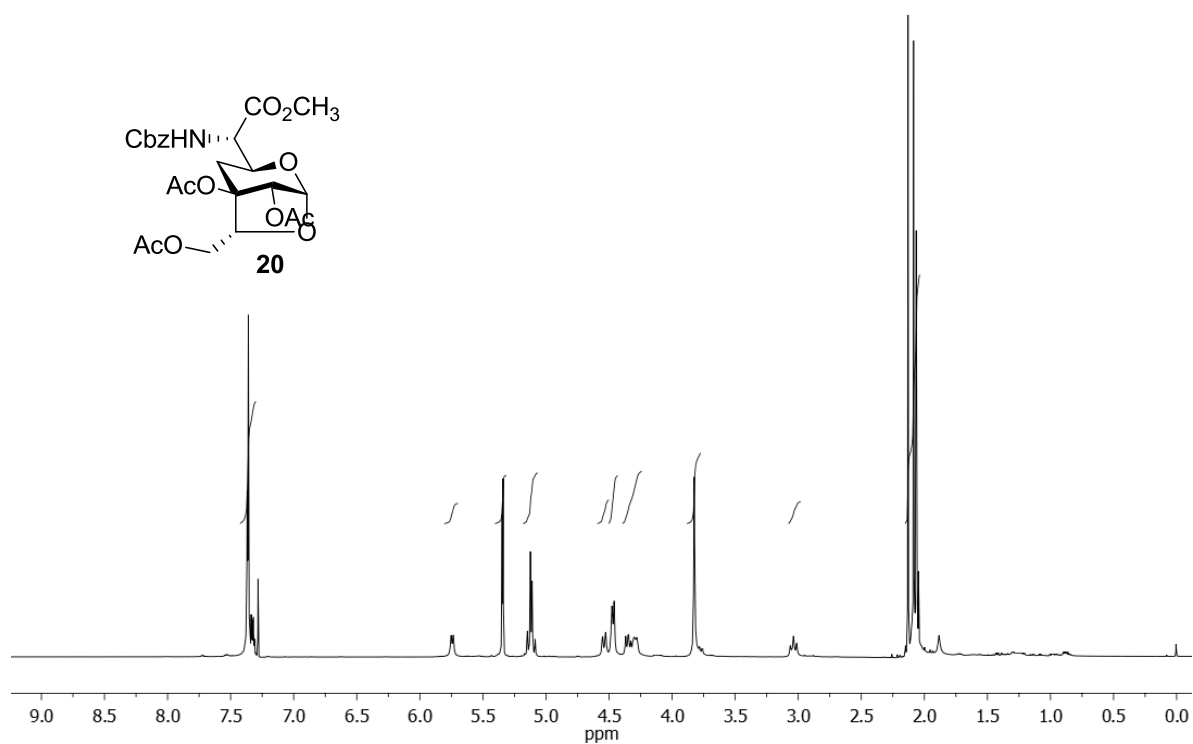

**Figure 29:** <sup>1</sup>H NMR (500 MHz, CDCl<sub>3</sub>) spectrum of compound **20**

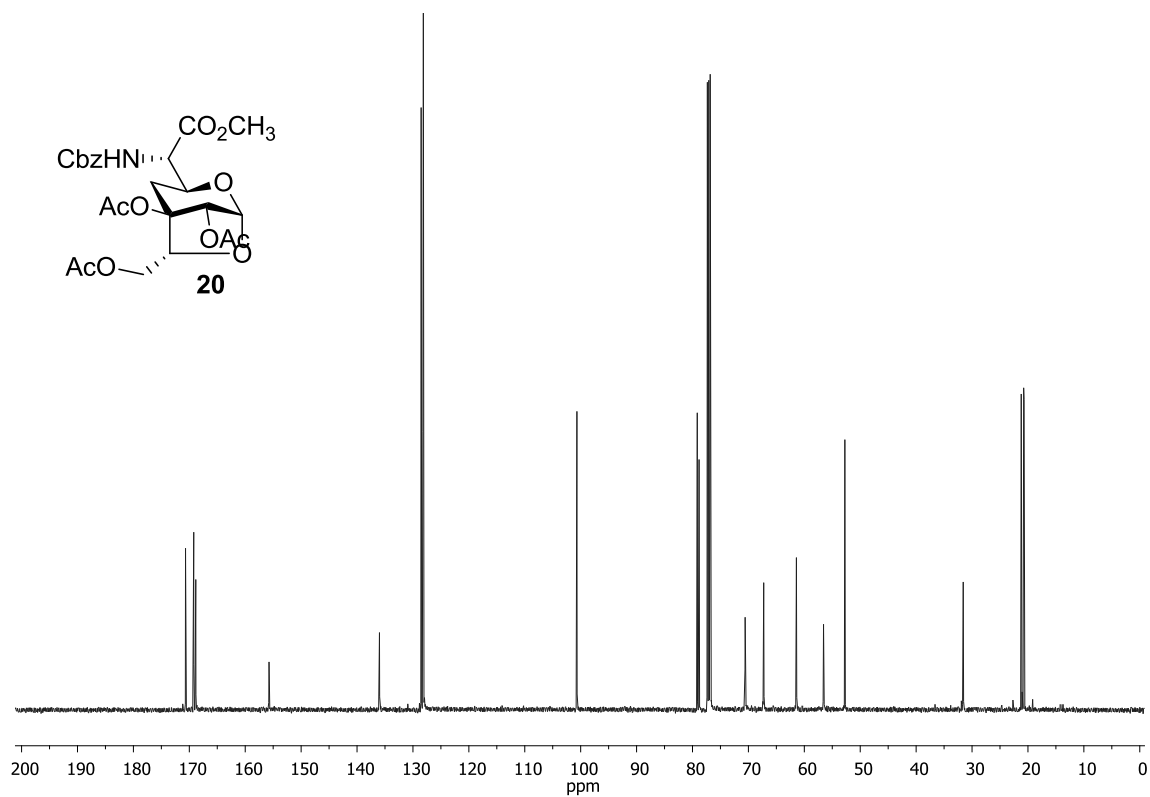

**Figure 30:** <sup>13</sup>C NMR (125 MHz, CDCl<sub>3</sub>) spectrum of compound **20**



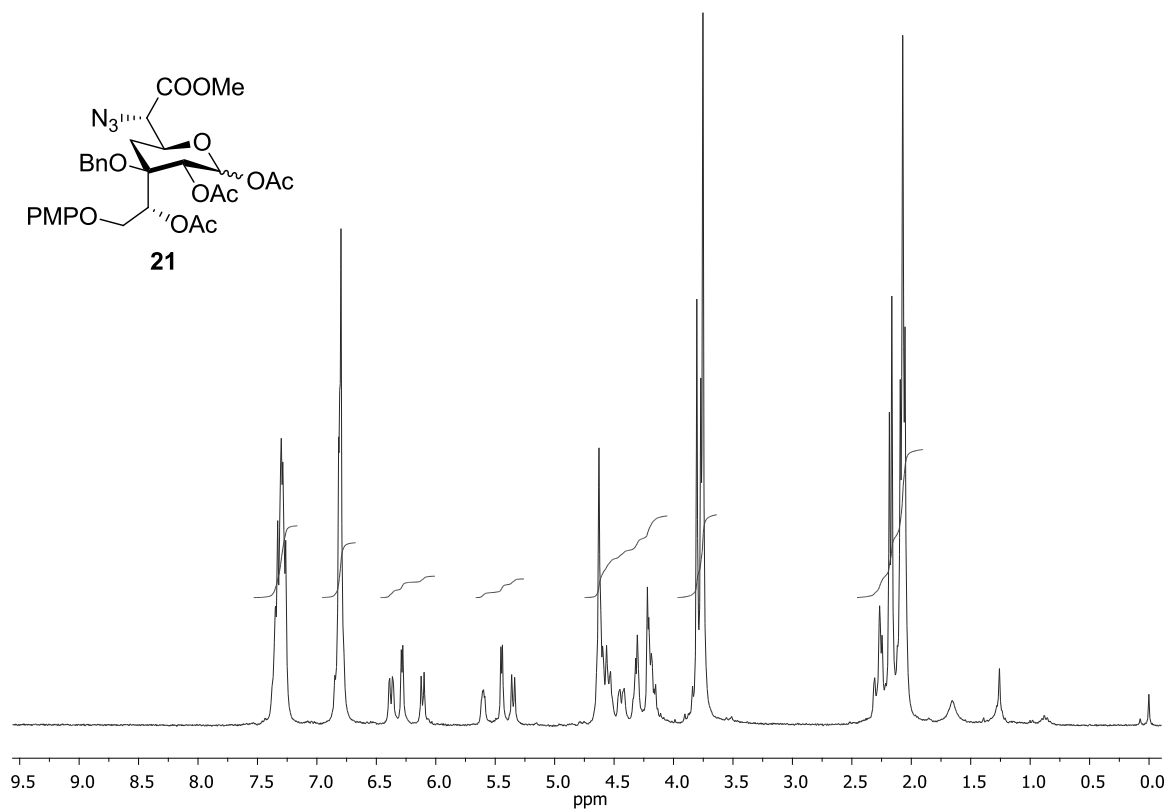

**Figure 31:** <sup>1</sup>H NMR (300 MHz, CDCl<sub>3</sub>) spectrum of compound **21**

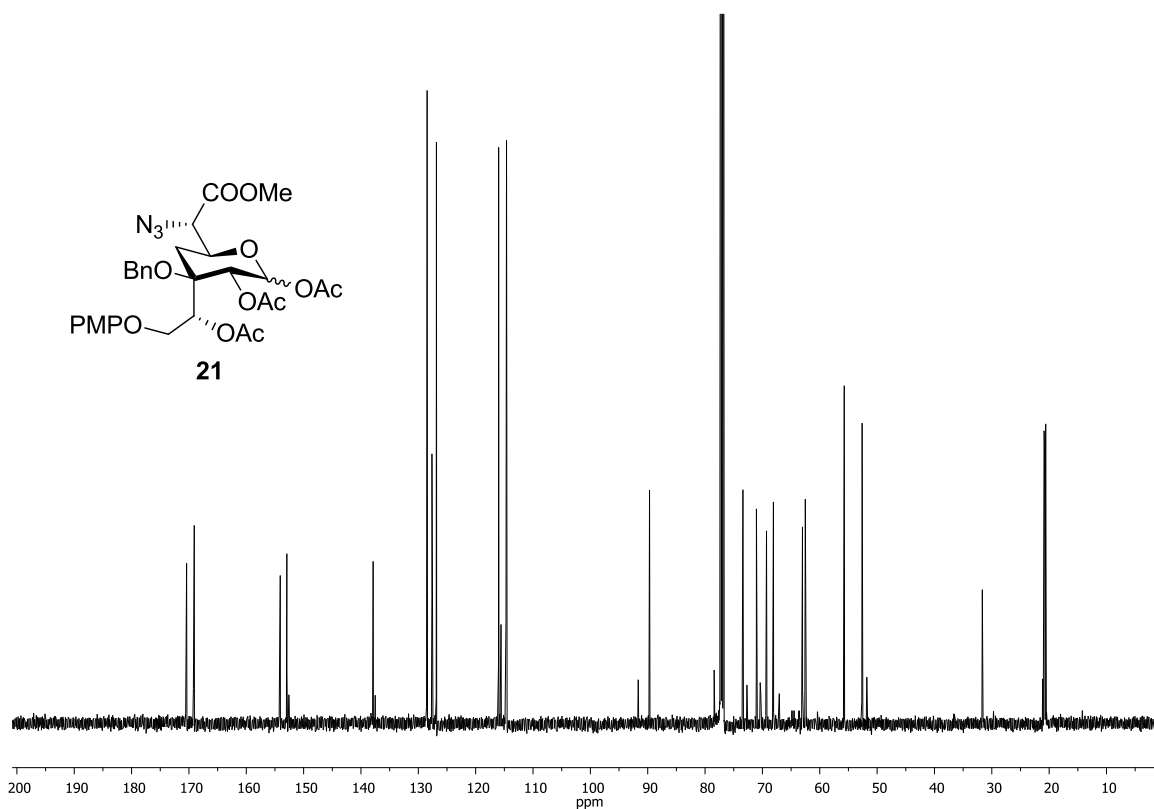

**Figure 32:** <sup>13</sup>C NMR (125 MHz, CDCl<sub>3</sub>) spectrum of compound **21**

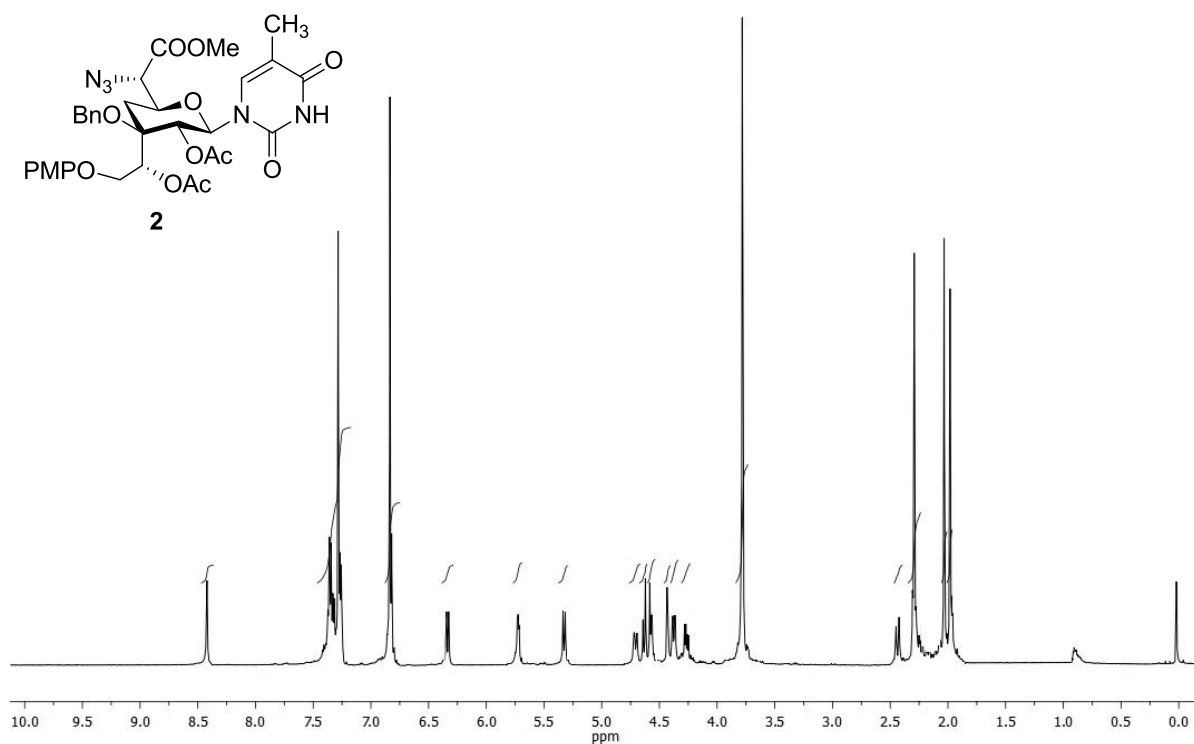

**Figure 33:**  $^1\text{H}$  NMR (500 MHz,  $\text{CDCl}_3$ ) spectrum of compound **2**

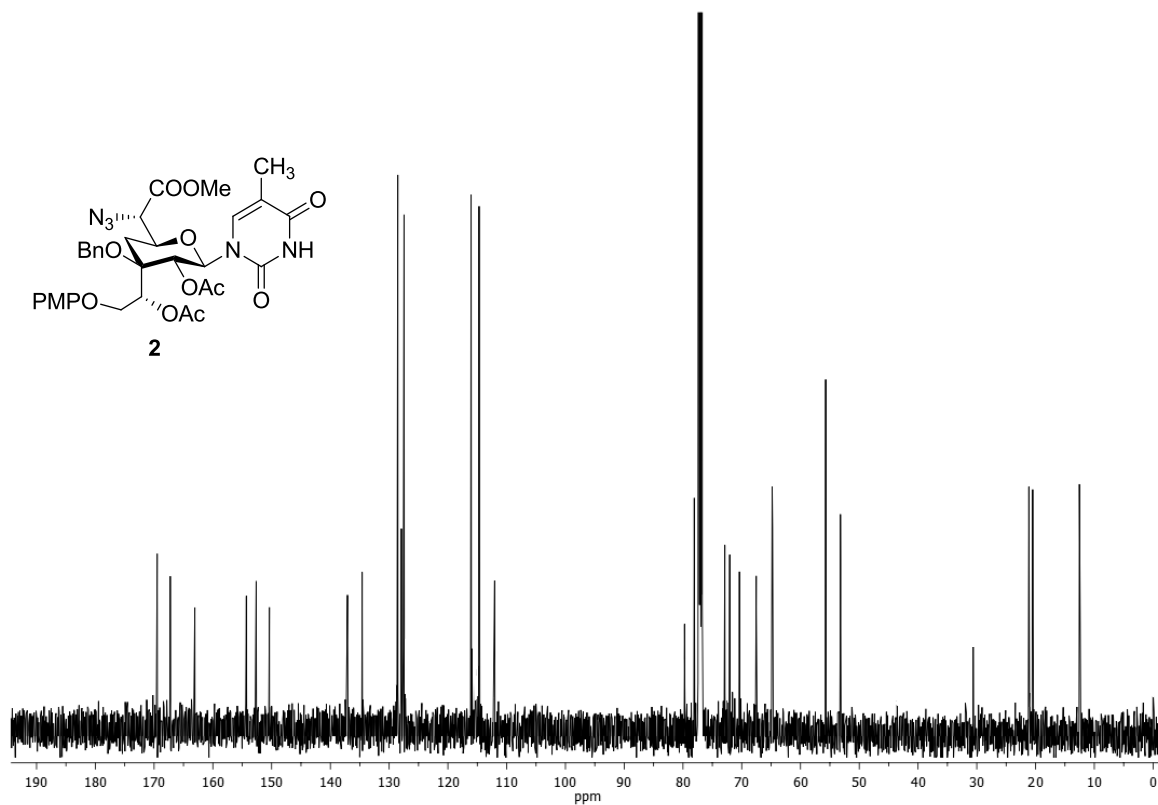

**Figure 34:**  $^{13}\text{C}$  NMR (125 MHz,  $\text{CDCl}_3$ ) spectrum of compound **2**

MFR-AM-OAC-1H

1D Selective Gradient NOESY  
freq: 2.305ppm

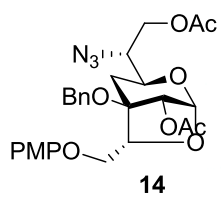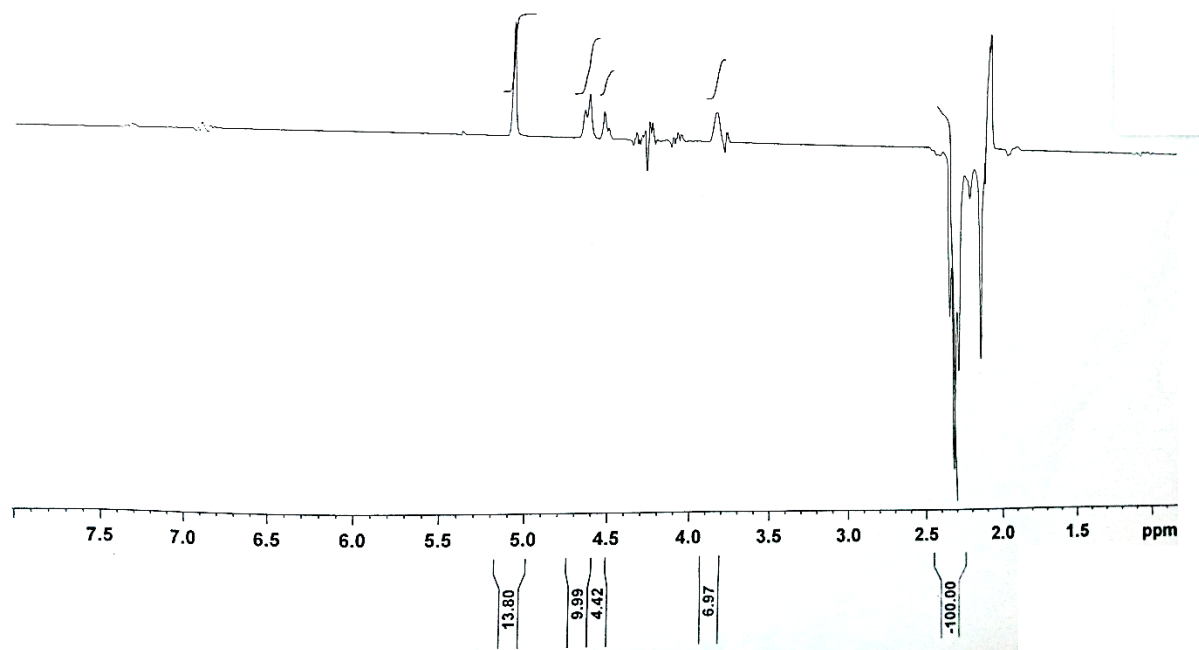

NOE spectrum compound 14
